# Supplementary material for: Identification and Characterization of Circular RNAs in Association With the Deposition of Intramuscular Fat in Aohan Fine-Wool Sheep
Source: Front Genet. 2021 Dec 6;12:759747. doi: 10.3389/fgene.2021.759747 (PMC8685527; doi:10.3389/fgene.2021.759747)
Supplement: Supplementary file 1 [file Table2.XLSX]

## Sheet: Sheet1
Supplementary Table2.Preliminary sequence statistics and quality control
Sample	Raw Data		Valid Data		Valid Ratio(reads)	Q20%	Q30%	GC content%
	Read	Base	Read	Base
Mth_12_1	90619672	13.59G	85252798	12.79G	94.08	99.98	98.03	49
Mth_12_2	95989952	14.40G	91240846	13.69G	95.05	99.98	98.15	49
Mth_12_3	89577658	13.44G	85201776	12.78G	95.11	99.98	98.17	49
Mth_2_1	90397074	13.56G	85098620	12.76G	94.14	99.98	98.02	49.5
Mth_2_2	89528496	13.43G	84675502	12.70G	94.58	99.98	97.98	51
Mth_2_3	88813860	13.32G	81473556	12.22G	91.74	99.97	97.83	53
