# Supplementary material for: Identification and Characterization of Circular RNAs in Association With the Deposition of Intramuscular Fat in Aohan Fine-Wool Sheep
Source: Front Genet. 2021 Dec 6;12:759747. doi: 10.3389/fgene.2021.759747 (PMC8685527; doi:10.3389/fgene.2021.759747)
Supplement: Supplementary file 2 [file Table3.XLSX]

## Sheet: Sheet1
Supplementary Table3.104 circRNAs were differentially expressed in Mth-12 and Mth-2
Accession	regulation	pvalue	geneName	Gene ID
circRNA7819	down	1.56416e-10	UHRF1BP1	101120704
circRNA2959	up	0.000256279	Null	Null
circRNA1737	down	0.000304566	COL15A1	101102453
circRNA2748	up	0.000316071	Null	Null
circRNA2757	up	0.000372845	Null	Null
circRNA3117	up	0.000424042	TTN	101122837
circRNA2349	up	0.000494232	SHPRH	101120671
circRNA4736	up	0.000597341	Null	Null
circRNA7648	down	0.000801602	TTN	101122837
circRNA6495	down	0.00100468	TMEM131L	101122892
circRNA4775	up	0.00129259	Null	Null
circRNA9172	down	0.00130999	Null	Null
circRNA7698	down	0.00156745	ENSOARG00000022030	Null
circRNA7601	down	0.00159987	ILDR2	101110204
circRNA7548	down	0.0017702	BEST3	101123543
circRNA7586	down	0.00201545	MED30	101120338
circRNA2683	up	0.00300231	LOC101108787	101108787
circRNA8215	down	0.00305019	RALGAPA1	101120113
circRNA4474	down	0.00309111	TTN	101122837
circRNA2440	down	0.00348449	LMO7	101102742
circRNA2762	down	0.00371215	Null	Null
circRNA639	up	0.00386208	KBTBD12	101107230
circRNA5784	down	0.00392656	ERI3	101116000
circRNA2639	up	0.00430822	USP34	101120484
circRNA4557	down	0.00448155	MSRB3	101108734
ciRNA105	up	0.00472818	ITGB3BP	101108702
circRNA1894	up	0.00478849	BOLL	101123609
circRNA4788	down	0.00479489	Null	Null
circRNA7760	down	0.00643276	Null	Null
circRNA7657	down	0.00650872	ENSOARG00000002894	Null
ciRNA85	up	0.00703169	ENSOARG00000001140	Null
circRNA7553	down	0.00706777	GMPS	101111850
circRNA1754	up	0.00711436	PGM5	101108630
circRNA7664	down	0.00730104	DOT1L	101121261
circRNA2477	up	0.00829287	SENP7	101111506
circRNA4809	up	0.00886803	Null	Null
circRNA4795	down	0.00932159	Null	Null
circRNA4773	up	0.00990648	Null	Null
circRNA4770	up	0.0100347	Null	Null
ciRNA153	up	0.0101816	TTN	101122837
circRNA7036	down	0.0105607	CLCN1	101115453
circRNA7515	down	0.0110953	AKAP7	101121177
circRNA7711	down	0.0111158	Null	Null
circRNA7445	down	0.011169	KAT2B	101115756
circRNA1241	down	0.0122908	ENSOARG00000009936	Null
ciRNA440	down	0.0128939	UBE2R2	101103036
circRNA5335	down	0.0140197	DPP8	101119728
circRNA9161	down	0.0155914	Null	Null
circRNA6534	down	0.016858	GFM2	101111659
circRNA6155	down	0.0171211	Null	Null
circRNA7754	down	0.0178612	Null	Null
ciRNA455	down	0.0200448	PLPP1	101115312
circRNA1254	up	0.0205702	ENSOARG00000007856	Null
circRNA7581	down	0.0206831	MBNL1	101114918
circRNA3144	up	0.0208205	LRRCC1	101118707
circRNA6915	down	0.0211222	JCHAIN	101121603
circRNA1736	down	0.0219772	COL15A1	101102453
circRNA2524	down	0.0222172	COL15A1	101102453
circRNA4515	down	0.0223751	COL15A1	101102453
circRNA7785	down	0.0226606	Null	Null
circRNA3066	up	0.02279	ENSOARG00000017195	101122837
circRNA6635	down	0.0233093	RBM6	101122896
circRNA829	up	0.0243694	SORBS1	101108178
circRNA1860	down	0.0256495	FMNL2	101116803
circRNA7598	down	0.0259629	MID2	101114170
circRNA7719	down	0.0259761	Null	Null
circRNA7831	down	0.0259815	HPS3	101122241
circRNA7412	down	0.0262235	GMPS	101111850
circRNA7771	down	0.0268192	Null	Null
circRNA1061	up	0.0275511	MAP4K5	101103818
circRNA2728	down	0.0276712	Null	Null
circRNA1874	down	0.0277454	ENSOARG00000025821	Null
circRNA1455	down	0.029137	GAPVD1	101105988
circRNA3162	down	0.0300536	RAB28	100147792
circRNA1817	down	0.0316906	TTN	101122837
circRNA3096	up	0.0325509	TTN	101122837
circRNA2666	up	0.033053	ESYT2	101118945
circRNA2577	up	0.0331307	HACE1	101121941
circRNA2496	up	0.0346483	SRFBP1	101112478
circRNA2119	up	0.0360547	ACAP2	101102615
circRNA1566	up	0.036818	NR2C1	101116557
circRNA6978	down	0.0374723	RASA1	101119216
circRNA7618	down	0.0375653	CCSER2	101110815
circRNA7727	down	0.0376095	Null	Null
circRNA7805	down	0.037613	GIGYF2	101105449
circRNA2241	up	0.0377816	STAU2	101107105
circRNA4648	down	0.0382764	ENSOARG00000005438	101121853
circRNA2997	up	0.0385281	SPATA7	101118616
circRNA3668	down	0.0394179	PTPRM	101102951
ciRNA177	up	0.039444	MRPS25	101104277
circRNA7051	down	0.0399675	SMC6	101123020
circRNA5210	down	0.0422377	XYLT1	101111512
circRNA1047	up	0.0424318	NPTN	101110943
circRNA7741	down	0.043101	Null	Null
circRNA9191	down	0.0431643	Null	Null
circRNA6653	down	0.0433707	MIA2	101102181
circRNA9086	down	0.0434254	ASAP2	101102555
circRNA2531	up	0.0435069	FBXO31	101104521
circRNA6623	down	0.0444924	FOXP1	101114648
circRNA634	up	0.0448994	RAF1	101103190
circRNA7436	down	0.0457955	DNAJC13	101119603
circRNA2137	up	0.0475984	USP13	101107750
circRNA4814	down	0.0478469	Null	Null
circRNA1540	up	0.0478774	SLC9A2	101108738
