# Supplementary material for: Identification and Characterization of Circular RNAs in Association With the Deposition of Intramuscular Fat in Aohan Fine-Wool Sheep
Source: Front Genet. 2021 Dec 6;12:759747. doi: 10.3389/fgene.2021.759747 (PMC8685527; doi:10.3389/fgene.2021.759747)
Supplement: Supplementary file 3 [file Table4.XLSX]

## Sheet: Sheet1
Supplementary Table4.The 12 KEGG pathways involve the tencircRNAs and their corresponding ten source genes.
pathway_id	pathway_name	Genes
ko04666	Fc gamma R-mediated phagocytosis	circRNA634(RAF1);circRNA9086(ENSOARG00000014894);ciRNA455(ENSOARG00000007720)
ko04520	Adherens junction	circRNA2440(ENSOARG00000015818);circRNA3668(PTPRM);circRNA829(SORBS1)
ko04919	Thyroid hormone signaling pathway	circRNA634(RAF1);circRNA7445(KAT2B);circRNA7586(ENSOARG00000010177)
ko04975	Fat digestion and absorption	ciRNA455(ENSOARG00000007720)
ko04330	Notch signaling pathway	circRNA7445(KAT2B)
ko00600	Sphingolipid metabolism	ciRNA455(ENSOARG00000007720)
ko00565	Ether lipid metabolism	ciRNA455(ENSOARG00000007720)
ko00561	Glycerolipid metabolism	ciRNA455(ENSOARG00000007720)
ko00564	Glycerophospholipid metabolism	ciRNA455(ENSOARG00000007720)
ko04724	Glutamatergic synapse	circRNA1241(ENSOARG00000009936)
ko04010	MAPK signaling pathway	circRNA634(RAF1);circRNA6978(RASA1)
ko04071	Sphingolipid signaling pathway	circRNA634(RAF1)
