# Supplementary material for: Identification and Characterization of Circular RNAs in Association With the Deposition of Intramuscular Fat in Aohan Fine-Wool Sheep
Source: Front Genet. 2021 Dec 6;12:759747. doi: 10.3389/fgene.2021.759747 (PMC8685527; doi:10.3389/fgene.2021.759747)
Supplement: Supplementary file 4 [file Table1.XLSX]

## Sheet: Sheet1
Supplementary Table1. Primers for qRT-PCR
circRNAs	forward primers(5’→3’）	reverse primers(5’→3’）	Size (bp)
ciRNA67	TGTTCTTTGCCATTTTCA	CCTTTTCTTCCCATCCTC	84
circRNA2591	GAGTCTCGGGGTGTTTTACG	TCAGCCAGGTGCTTCTTATC	332
circRNA2773	GCTCTTGGAGGTGTGGGCT	TTCAGATGGGAGTTTTCGG	111
circRNA931	TGAGGAAGGAGCACGGGAAG	ACTCGGGGCAGGTGTAGGGA	120
circRNA4515	GCATTCTTCTGATTCTCCT	GTCTTGGCTGGTTCGTCTA	201
circRNA1241	CCAGGATGGGGGAGAAC	TTGGGAGTGACAGTGCT	81
circRNA1754	ATGGGAGTCCGAGGGTT	GGTCCGAAGGAGGTTGA	247
GAPDH	AAGTTCAACGGCACAGTCA	ACCACATACTCAGCACCAGC	125
