# Supplementary material for: Identification and Characterization of Circular RNAs in Association With the Deposition of Intramuscular Fat in Aohan Fine-Wool Sheep
Source: Front Genet. 2021 Dec 6;12:759747. doi: 10.3389/fgene.2021.759747 (PMC8685527; doi:10.3389/fgene.2021.759747)
Supplement: Supplementary file 5 [file Table5.XLSX]

## Sheet: Sheet1
Supplementary Table5. The 12 circRNAs and their target 70 miRNAs.
circRNA	miRNA
circRNA2666	oar-miR-493-3p
circRNA2666	oar-miR-541-3p
circRNA6495	oar-miR-543-5p
circRNA6495	oar-miR-30c
circRNA6495	oar-miR-30b
circRNA6495	oar-miR-376a-5p
circRNA6495	oar-miR-30a-5p
circRNA6495	oar-miR-30d
ciRNA455	oar-miR-150
ciRNA455	oar-miR-541-3p
ciRNA455	oar-miR-200b
ciRNA455	oar-miR-493-5p
ciRNA455	oar-miR-544-5p
ciRNA455	oar-miR-654-3p
ciRNA455	oar-miR-665-3p
ciRNA455	oar-miR-29b
ciRNA455	oar-miR-107
ciRNA455	oar-miR-154b-5p
ciRNA455	oar-miR-329b-5p
ciRNA455	oar-miR-200c
ciRNA455	oar-miR-544-3p
ciRNA455	oar-miR-103
ciRNA455	oar-miR-29a
ciRNA455	oar-miR-382-3p
ciRNA455	oar-miR-181a
ciRNA455	oar-miR-539-5p
ciRNA455	oar-miR-323a-5p
ciRNA455	oar-miR-1197-5p
ciRNA455	oar-miR-541-5p
ciRNA455	oar-miR-487a-5p
ciRNA455	oar-miR-3955-5p
ciRNA455	oar-miR-127
ciRNA455	oar-miR-136
ciRNA455	oar-miR-496-3p
ciRNA455	oar-miR-16b
ciRNA455	oar-miR-495-3p
ciRNA455	oar-miR-27a
ciRNA455	oar-miR-3955-3p
ciRNA455	oar-miR-329a-5p
ciRNA455	oar-miR-376a-3p
ciRNA455	oar-miR-376b-3p
ciRNA455	oar-miR-376d
ciRNA455	oar-miR-376c-3p
ciRNA455	oar-miR-411a-3p
ciRNA455	oar-miR-543-3p
ciRNA455	oar-miR-323a-3p
ciRNA455	oar-miR-3958-3p
ciRNA455	oar-miR-412-5p
ciRNA455	oar-miR-369-3p
ciRNA455	oar-miR-26b
ciRNA455	oar-miR-1185-3p
ciRNA455	oar-miR-379-3p
ciRNA455	oar-miR-26a
ciRNA455	oar-miR-410-3p
ciRNA455	oar-miR-376c-5p
ciRNA455	oar-miR-376e-3p
circRNA9086	oar-miR-376a-5p
circRNA2440	oar-miR-370-3p
circRNA2440	oar-miR-134-3p
circRNA2440	oar-miR-431
circRNA2440	oar-miR-23a
circRNA2440	oar-miR-26b
circRNA2440	oar-miR-23b
circRNA2440	oar-miR-26a
circRNA2440	oar-miR-654-3p
circRNA3668	oar-miR-3956-5p
circRNA3668	oar-miR-1193-5p
circRNA3668	oar-miR-485-5p
circRNA3668	oar-miR-544-3p
circRNA829	oar-miR-431
circRNA829	oar-miR-1197-5p
circRNA634	oar-miR-410-5p
circRNA634	oar-miR-10b
circRNA634	oar-miR-136
circRNA634	oar-miR-323c
circRNA7445	oar-miR-485-5p
circRNA7445	oar-miR-543-5p
circRNA7445	oar-miR-25
circRNA7586	oar-miR-541-3p
circRNA7586	oar-miR-382-5p
circRNA7586	oar-miR-376a-3p
circRNA7586	oar-miR-376b-3p
circRNA1241	oar-miR-541-3p
circRNA1241	oar-miR-329a-5p
circRNA1241	oar-miR-3955-3p
circRNA4557	oar-miR-149-5p
circRNA4557	oar-miR-370-3p
circRNA4557	oar-miR-125b
